# Supplementary material for: Facile synthesis of solid-state fluorescent organosilica nanoparticles with a photoluminescence quantum yield of 73.3% for fingerprint recognition and white-light-emitting diodes
Source: Royal Society of Chemistry journal article supplement (doi:10.1039/d0tc04800c), 2020-12-21
Supplement: d0tc04800c1.pdf [file d0tc04800c1.pdf]

## **Facile synthesis of solid-state fluorescent organosilica nanoparticles with a photoluminescence quantum yield of 73.3% for fingerprint recognition and white-light-emitting diodes**

Jiahao Liang<sup>a</sup>, Yongzhong Wu<sup>b</sup>, Xiao Gong<sup>\*a,c</sup>, Alberto Vomiero<sup>\*d,e</sup>

- a. State Key Laboratory of Silicate Materials for Architectures, Wuhan University of Technology, Wuhan 430070, China. E-mail: [xgong@whut.edu.cn](mailto:xgong@whut.edu.cn)
- b. School of Mechanical Engineering, Suzhou University of Science and Technology, Suzhou 215009, China
- c. State Key Laboratory of Polymer Materials Engineering, Sichuan University, Chengdu 610065, China
- d. Division of Materials Science, Department of Engineering Sciences and Mathematics, Luleå University of Technology, 971 87 Luleå, Sweden. E-mail: [alberto.vomiero@ltu.se](mailto:alberto.vomiero@ltu.se)
- e. Department of Molecular Science and Nano Systems, Ca' Foscari University of Venice Via Torino 155, 30172 Venezia Mestre, Italy

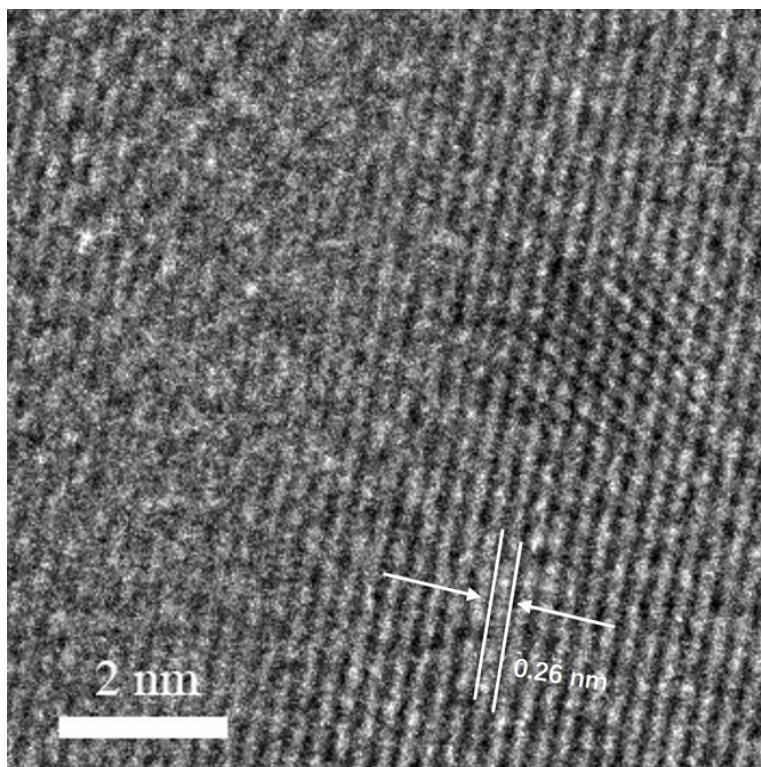

**Figure S1.** HRTEM image of residual ZnO crystals in polymer-like coated OSiNPs.

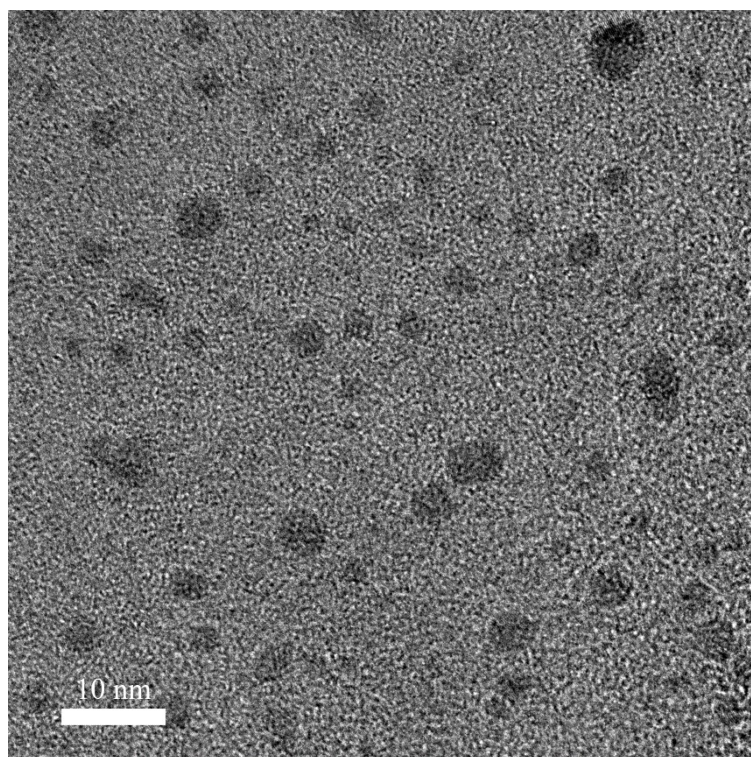

**Figure S2.** TEM images of OSiNPs synthesized without  $\text{Zn}^{2+}$ .

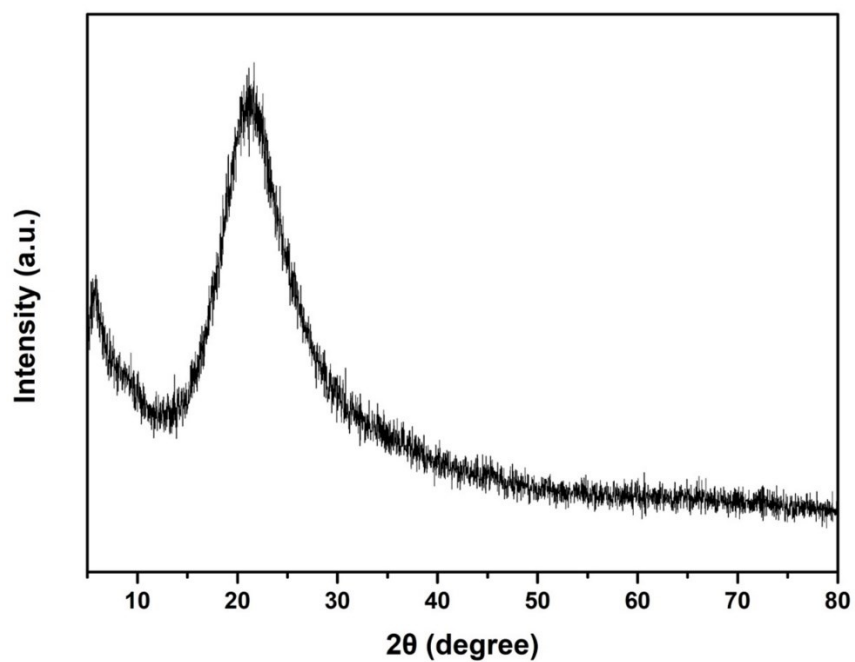

**Figure S3.** XRD pattern of OSiNPs synthesized without  $Zn^{2+}$ .

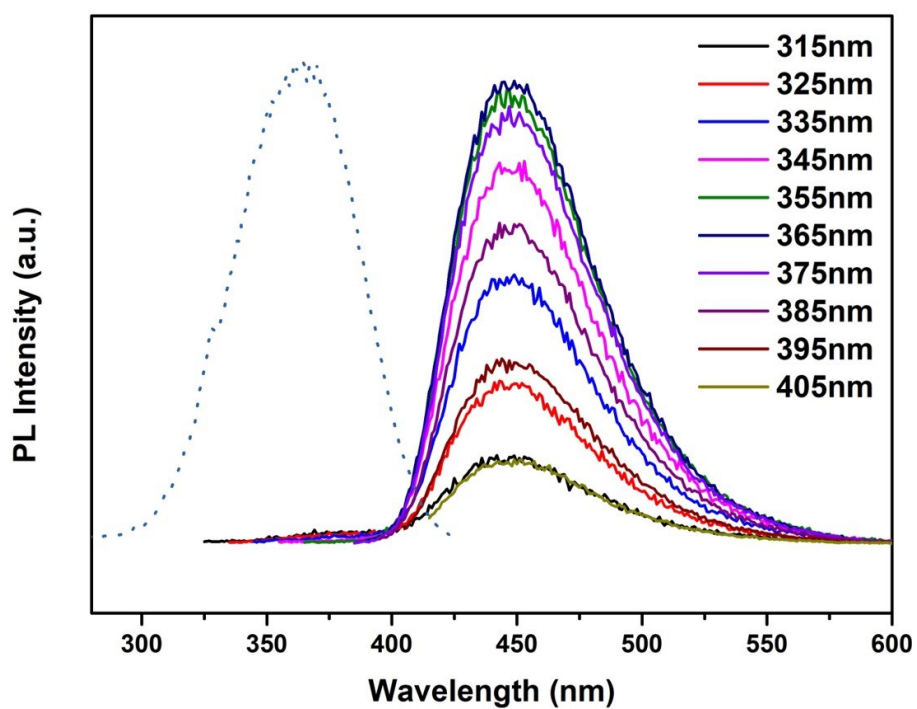

**Figure S4.** PL excitation (dotted line,  $\lambda_{em}=444$  nm) and excitation-independent (solid line) spectra of polymer-like coated OSiNPs synthesized without  $Zn^{2+}$  dispersed in aqueous solution.

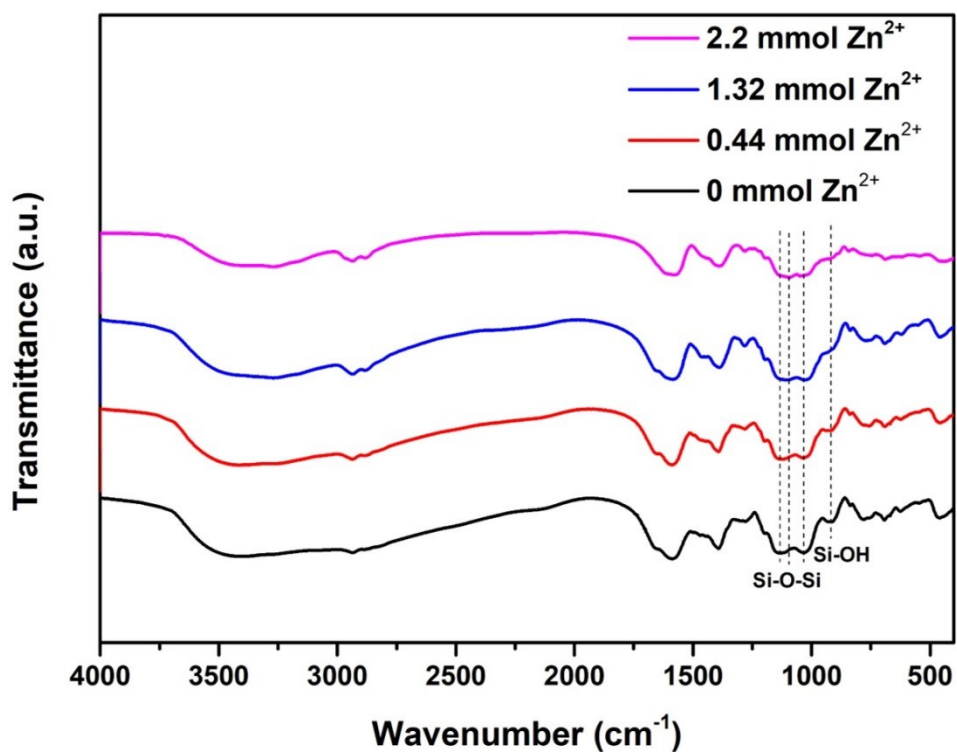

**Figure S5.** FTIR spectra of OSiNPs synthesized with different amount of Zn<sup>2+</sup>.
